# Supplementary material
Source: PubMed Central journal article supplement (PMC2695675)

S1. Supplementary Figure 1. Survival plots for female mice treated with NDGA (upper left), aspirin (upper right), NFP (lower left) or 4-OH-PBN (lower right.) Each symbol represents an individual mouse dying at the age indicated. There were no significant differences between treated and control groups using the log-rank test.

S2. Supplementary Figure 2. Effects of gender on ASA and SA levels in plasma of young UM-HET3 mice after four weeks of consumption of food containing aspirin (ASA) at either 20 mg per kg food ("low dose", right panels) or 60 mg per kg food ("high dose", left panels). Each symbol represents an individual mouse, and median values are shown by horizontal lines. The p-values show the outcomes of Mann-Whitney tests for differences between males and females. Top row: ASA levels. Middle row: SA levels.

Supplementary Figure 1 -

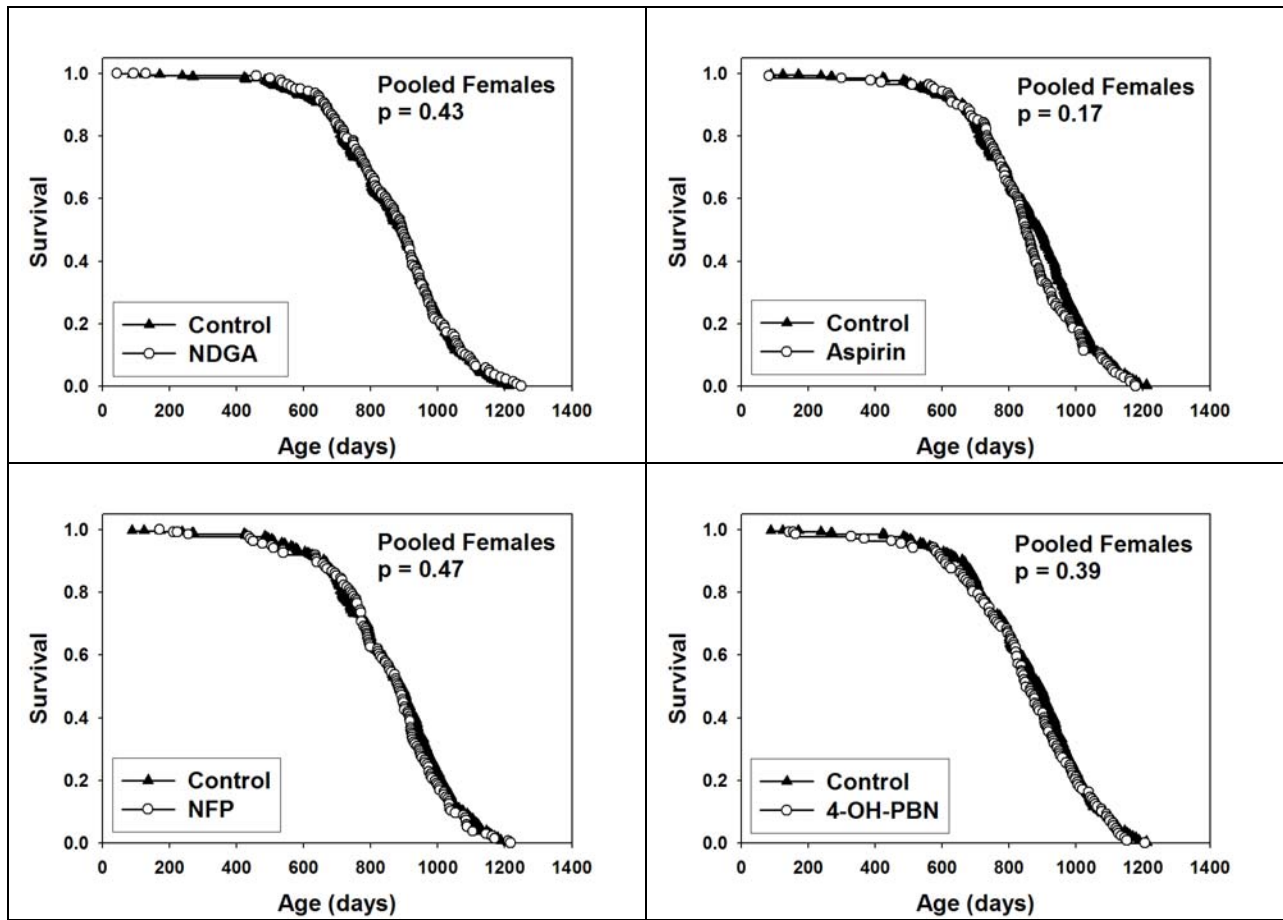

Supplementary Figure 2-

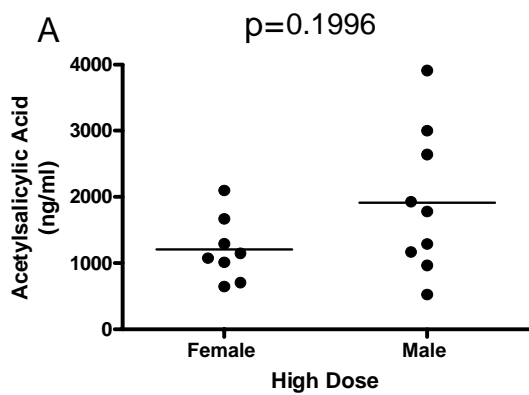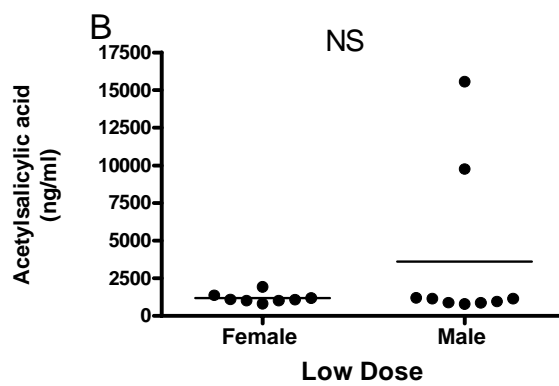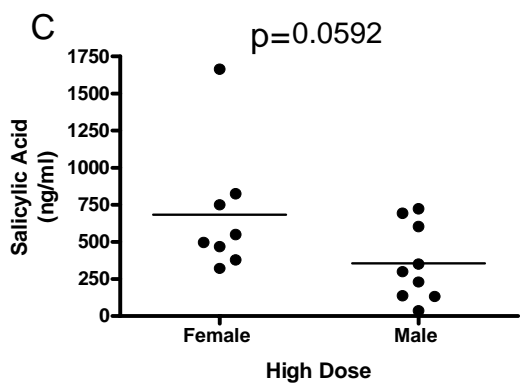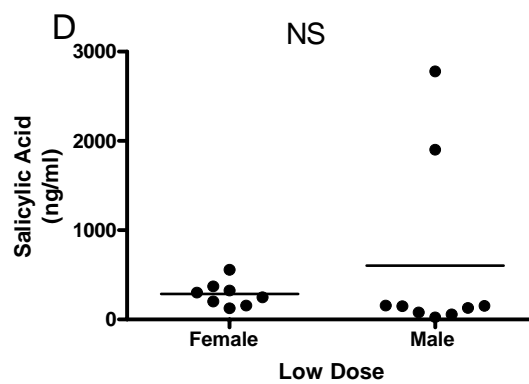

Supplement: NIHMS109662-supplement-supplement_1.pdf [file NIHMS109662-supplement-supplement_1.pdf]
